# Supplementary material
Source: PubMed Central journal article supplement (PMC3580017)

## Supporting Information

### **Alkaloids from *Microcos paniculata* with Cytotoxic and Nicotinic Receptor Antagonistic Activities**

Patrick C. Still,<sup>†</sup> Bitna Yi,<sup>‡</sup> Tatiana F. González-Cestari,<sup>‡</sup> Li Pan,<sup>†</sup> Ryan E. Pavlovicz,<sup>†,§</sup> Hee-Byung Chai,<sup>†</sup> Tran Ngoc Ninh,<sup>⊥</sup> Chenglong Li,<sup>†</sup> Djaja Djendoel Soejarto,<sup>||,∇</sup> Dennis B. McKay,<sup>‡</sup> and A. Douglas Kinghorn<sup>\*,†</sup>

<sup>†</sup>Division of Medicinal Chemistry and Pharmacognosy, College of Pharmacy, The Ohio State University, Columbus, Ohio 43210, United States

<sup>‡</sup>Division of Pharmacology, College of Pharmacy, The Ohio State University, Columbus, Ohio 43210, United States

<sup>§</sup>Biophysics Graduate Program, The Ohio State University, Columbus, Ohio 43210, United States

<sup>⊥</sup>Institute of Ecology and Biological Resources, Vietnamese Academy of Science and Technology, Hoang Quoc Viet, Cau Giay, Hanoi, Vietnam

<sup>||</sup>Program for Collaborative Research in the Pharmaceutical Sciences and Department of Medicinal Chemistry and Pharmacognosy, College of Pharmacy, University of Illinois at Chicago, Chicago, Illinois 60612, United States

<sup>∇</sup>Department of Botany, Field Museum of Natural History, 1400 S. Lake Shore Drive, Chicago, Illinois 60605, United States

\*To whom correspondence should be address. Tel.: +1 614 247-8094. Fax: +1 614 247-8642

E-mail: [kinghorn.4@osu.edu](mailto:kinghorn.4@osu.edu)

## Table of contents

- Figure S1.**  $^1\text{H}$  NMR spectrum of Microgrewiapine A (**1**). ( $\text{CDCl}_3$ , 600 MHz)  
**Figure S2.**  $^{13}\text{C}$  NMR spectrum of Microgrewiapine A (**1**). ( $\text{CDCl}_3$ , 150 MHz)  
**Figure S3.**  $^{13}\text{C}$  DEPT spectrum of Microgrewiapine A (**1**). ( $\text{CDCl}_3$ , 150 MHz)  
**Figure S4.** HSQC spectrum of Microgrewiapine A (**1**). ( $\text{CDCl}_3$ , 600 MHz)  
**Figure S5.** HMBC spectrum of Microgrewiapine A (**1**). ( $\text{CDCl}_3$ , 600 MHz)  
**Figure S6.** COSY spectrum of Microgrewiapine A (**1**). ( $\text{CDCl}_3$ , 600 MHz)  
**Figure S7.** NOESY spectrum of Microgrewiapine A (**1**). ( $\text{CDCl}_3$ , 600 MHz)  
**Figure S8.**  $^1\text{H}$  NMR spectrum of Microgrewiapine B (**2**). ( $\text{CDCl}_3$ , 400 MHz)  
**Figure S9.**  $^{13}\text{C}$  NMR spectrum of Microgrewiapine B (**2**). ( $\text{CDCl}_3$ , 100 MHz)  
**Figure S10.**  $^{13}\text{C}$  DEPT spectrum of Microgrewiapine B (**2**). ( $\text{CDCl}_3$ , 100 MHz)  
**Figure S11.** HSQC spectrum of Microgrewiapine B (**2**). ( $\text{CDCl}_3$ , 400 MHz)  
**Figure S12.** HMBC spectrum of Microgrewiapine B (**2**). ( $\text{CDCl}_3$ , 400 MHz)  
**Figure S13.** COSY spectrum of Microgrewiapine B (**2**). ( $\text{CDCl}_3$ , 400 MHz)  
**Figure S14.** NOESY spectrum of Microgrewiapine B (**2**). ( $\text{CDCl}_3$ , 400 MHz)  
**Figure S15.**  $^1\text{H}$  NMR spectrum of Microgrewiapine C (**3**). ( $\text{CDCl}_3$ , 400 MHz)  
**Figure S16.**  $^{13}\text{C}$  NMR spectrum of Microgrewiapine C (**3**). ( $\text{CDCl}_3$ , 100 MHz)  
**Figure S17.**  $^{13}\text{C}$  DEPT spectrum of Microgrewiapine C (**3**). ( $\text{CDCl}_3$ , 100 MHz)  
**Figure S18.** HSQC spectrum of Microgrewiapine C (**3**). ( $\text{CDCl}_3$ , 400 MHz)  
**Figure S19.** HMBC spectrum of Microgrewiapine C (**3**). ( $\text{CDCl}_3$ , 600 MHz)  
**Figure S20.** COSY spectrum of Microgrewiapine C (**3**). ( $\text{CDCl}_3$ , 400 MHz)  
**Figure S21.** NOESY spectrum of Microgrewiapine C (**3**). ( $\text{CDCl}_3$ , 400 MHz)  
**Figure S22.** ESIMS spectrum of Microgrewiapine A (**1**).  
**Figure S23.** ESIMS spectrum of Microgrewiapine B (**2**).  
**Figure S24.** ESIMS spectrum of Microgrewiapine C (**3**).  
**Figure S25.**  $^1\text{H}$  NMR spectrum of (*R*)- and (*S*)-MTPA esters of **1** (pyridine-*d*<sub>5</sub>, 400 MHz)  
**Figure S26.** COSY spectrum of (*R*)-MTPA ester of **1** (pyridine-*d*<sub>5</sub>, 400 MHz)

**Figure S1.**  $^1\text{H}$  NMR spectrum of Microgrewiapine A (**1**) ( $\text{CDCl}_3$ , 600 MHz)

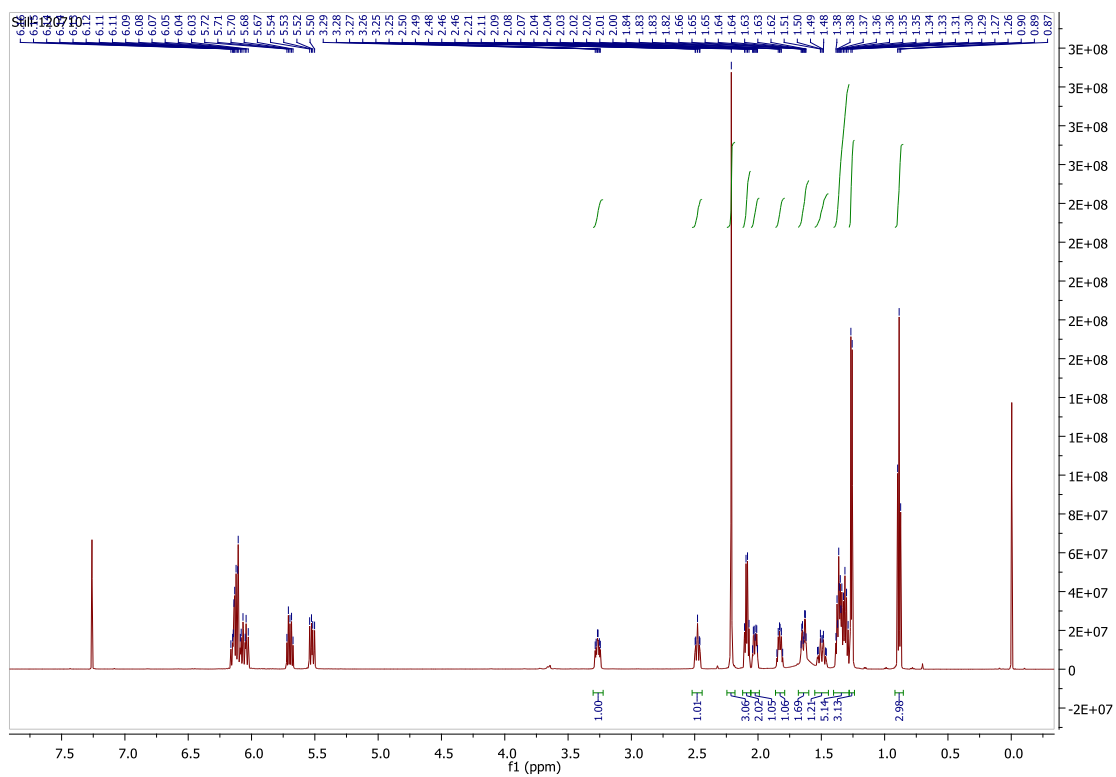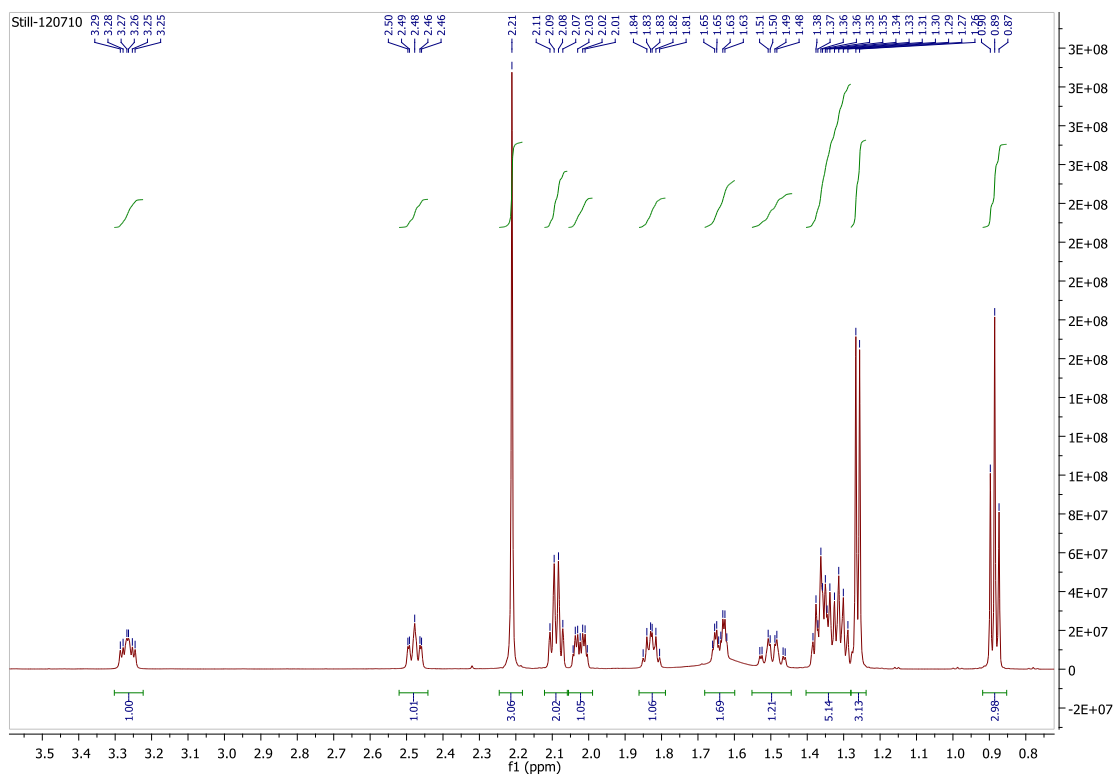

**Figure S2.**  $^{13}\text{C}$  NMR spectrum of Microgrewiapiine A (**1**). ( $\text{CDCl}_3$ , 150 MHz)

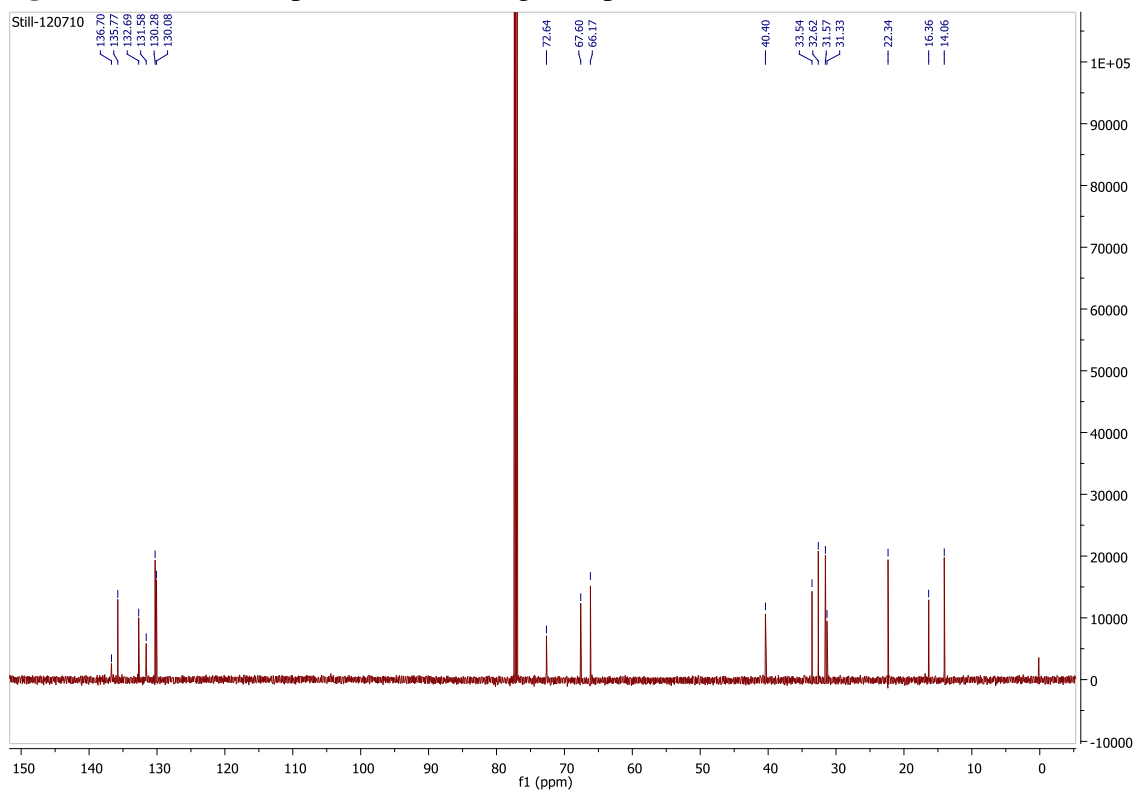

**Figure S3.**  $^{13}\text{C}$  DEPT spectrum of Microgrewiapiine A (**1**). ( $\text{CDCl}_3$ , 150 MHz)

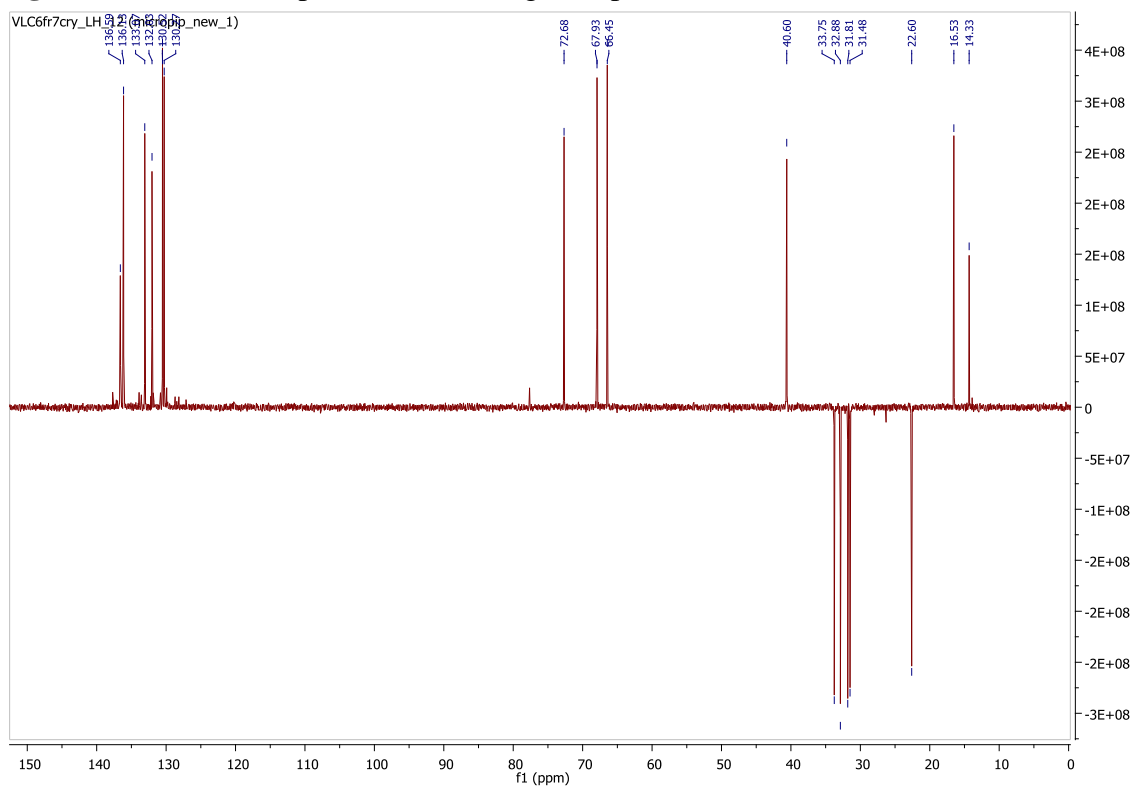

**Figure S4.** HSQC spectrum of Microgrewiapiine A (**1**). (CDCl<sub>3</sub>, 600 MHz)

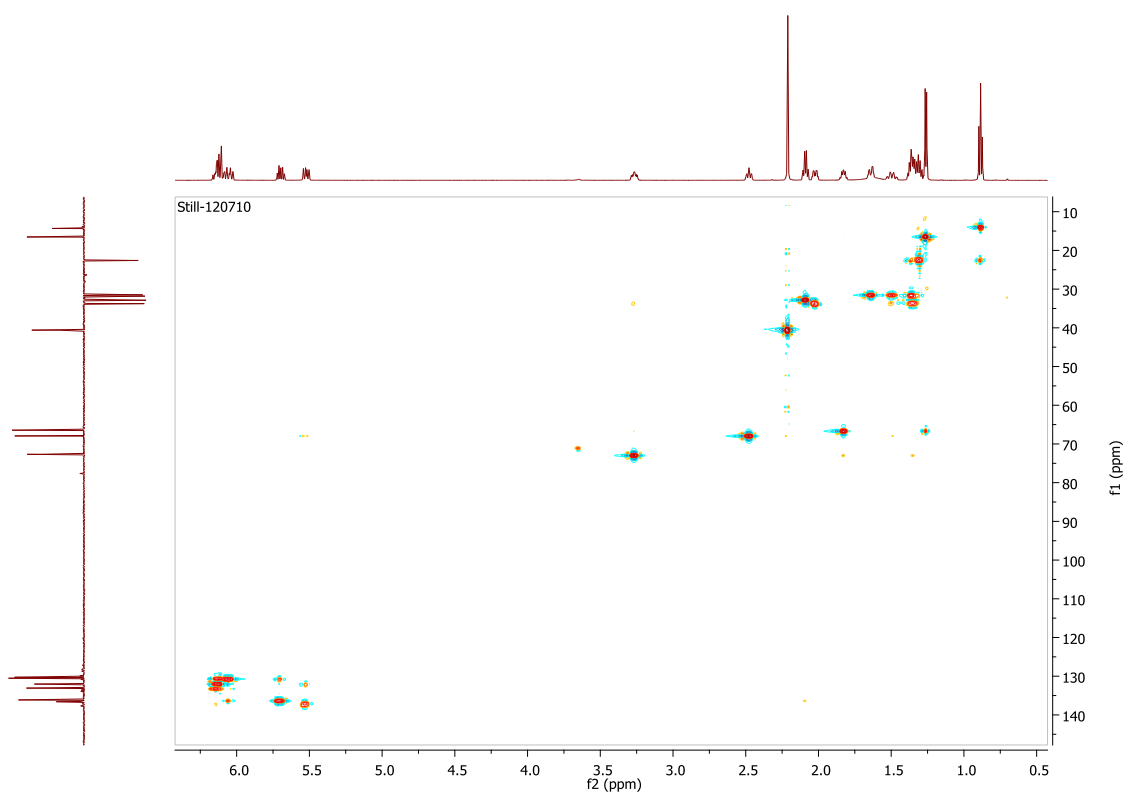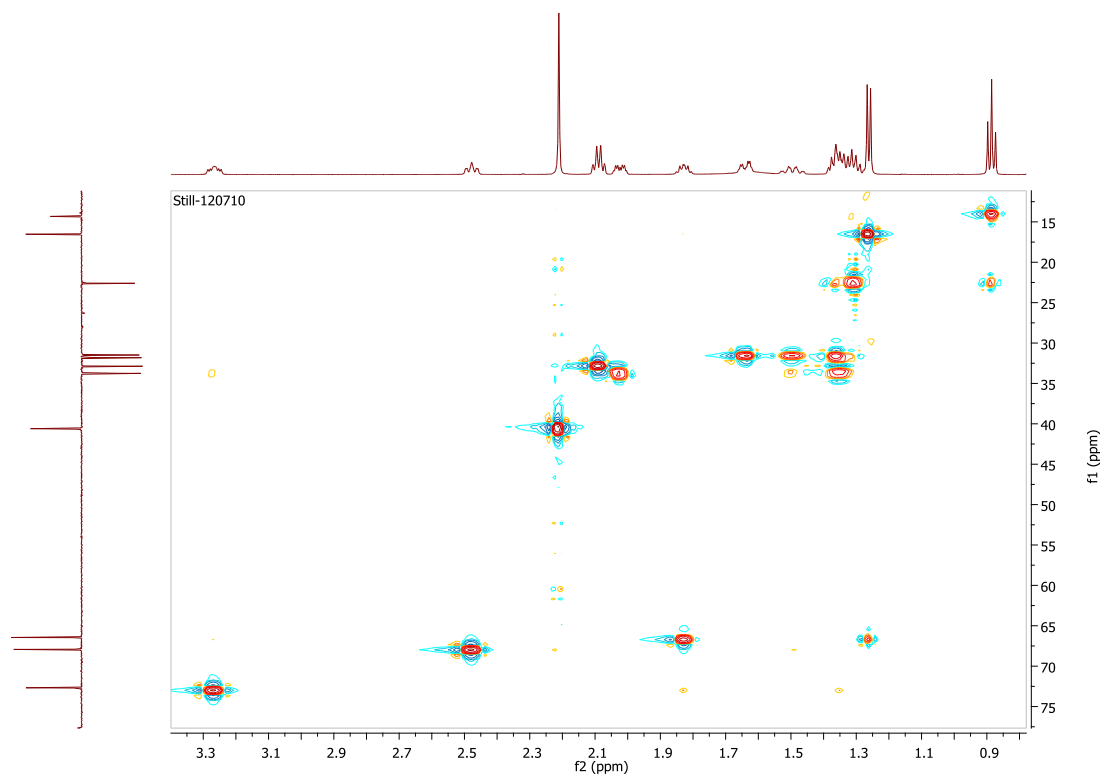

**Figure S5.** HMBC spectrum of Microgrewiapiine A (**1**). (CDCl<sub>3</sub>, 600 MHz)

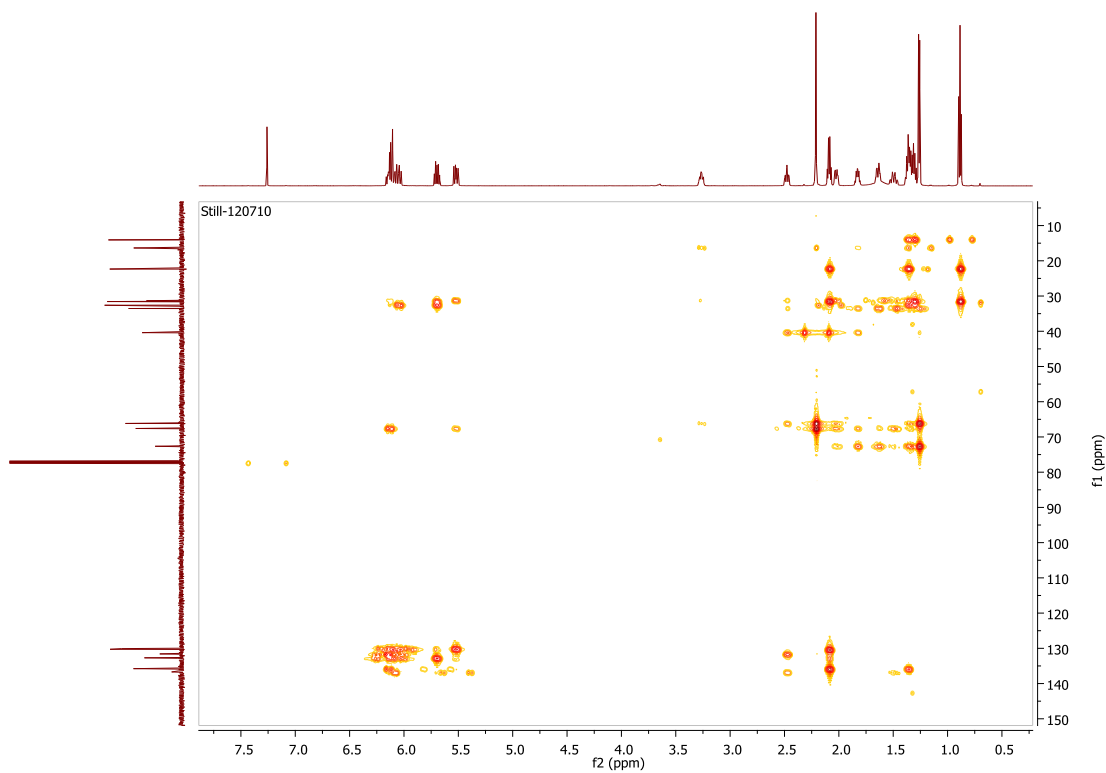

**Figure S6.** COSY spectrum of Microgrewiapiine A (**1**). (CDCl<sub>3</sub>, 600 MHz)

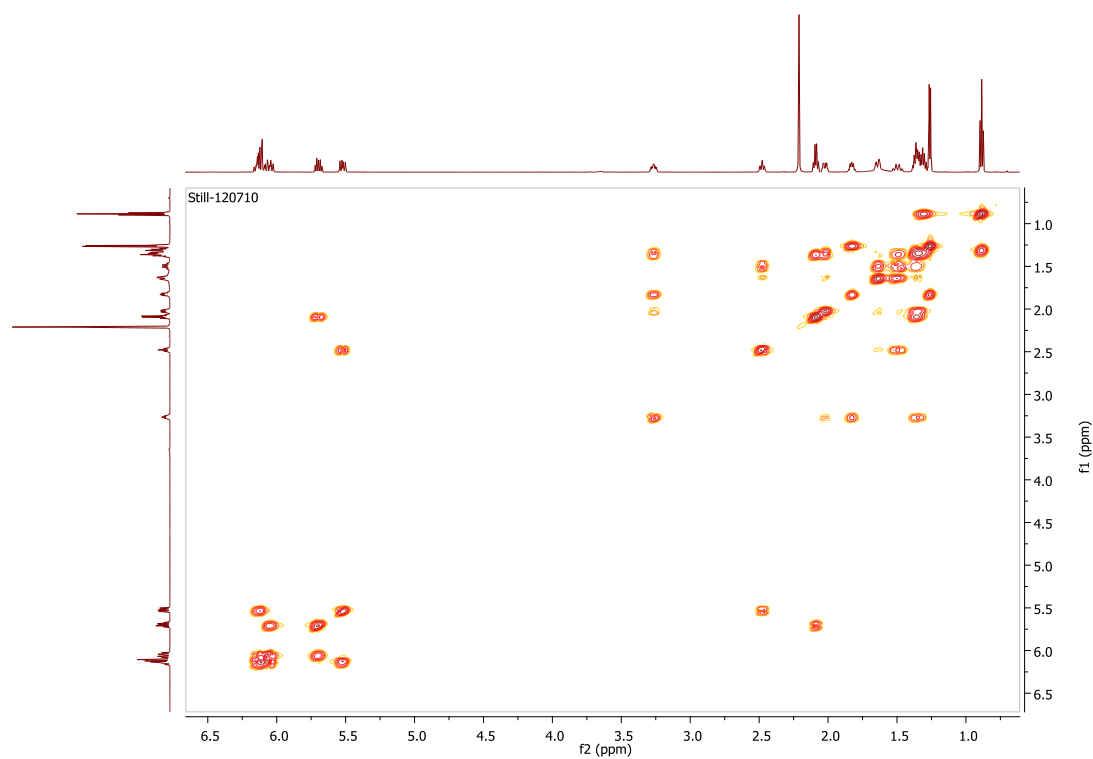

**Figure S7.** NOESY spectrum of Microgrewiapine A (**1**). (CDCl<sub>3</sub>, 600 MHz)

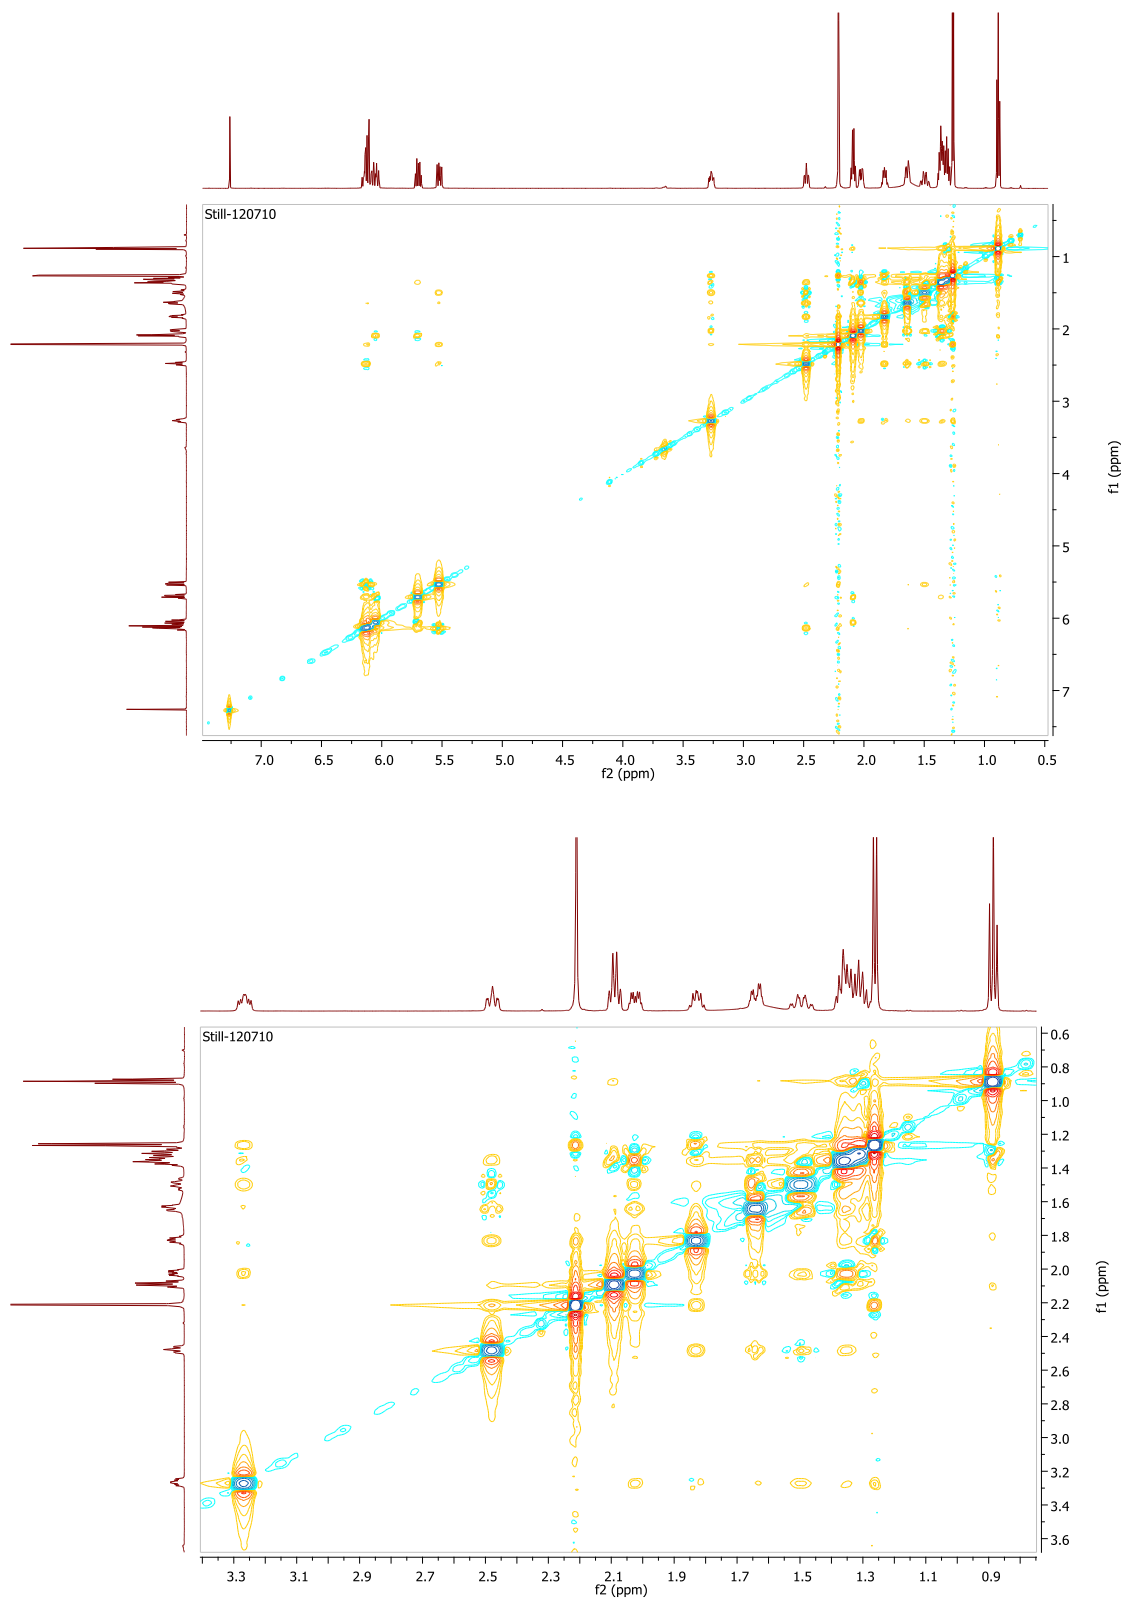

**Figure S8.**  $^1\text{H}$  NMR spectrum of Microgrewiapiine B (**2**) ( $\text{CDCl}_3$ , 400 MHz)

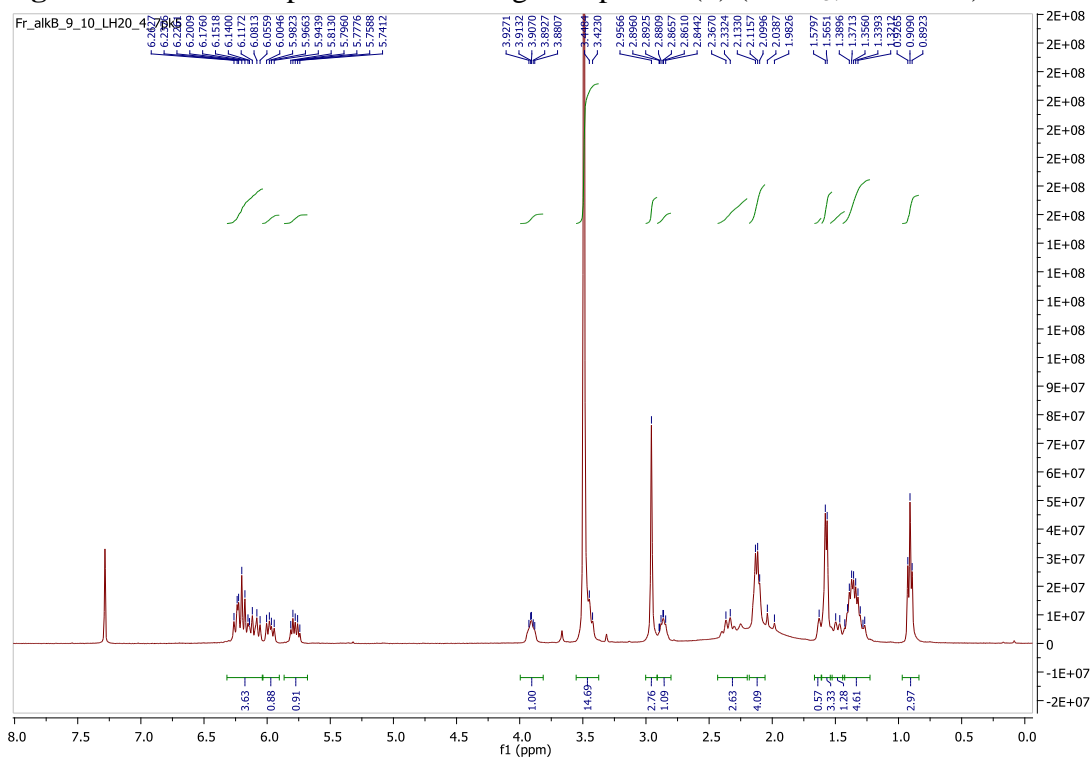

**Figure S9.**  $^{13}\text{C}$  NMR spectrum of Microgrewiapiine B (**2**). ( $\text{CDCl}_3$ , 100 MHz)

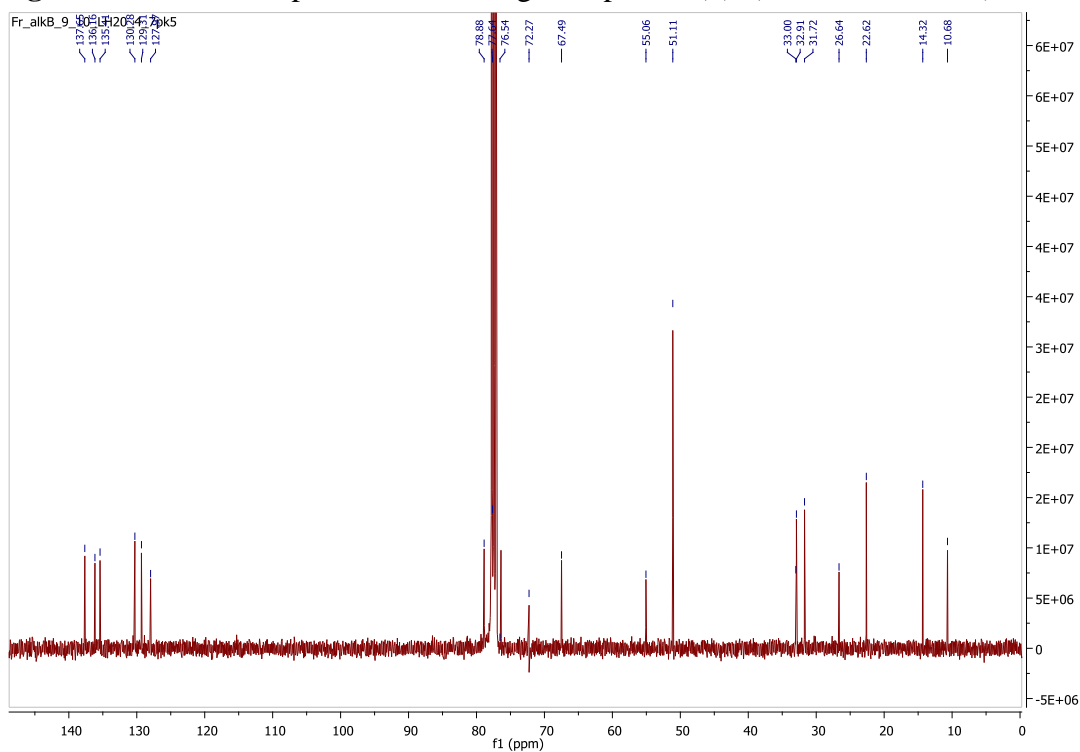



**Figure S10.**  $^{13}\text{C}$  DEPT spectrum of Microgrewiapiine B (**2**). ( $\text{CDCl}_3$ , 100 MHz)

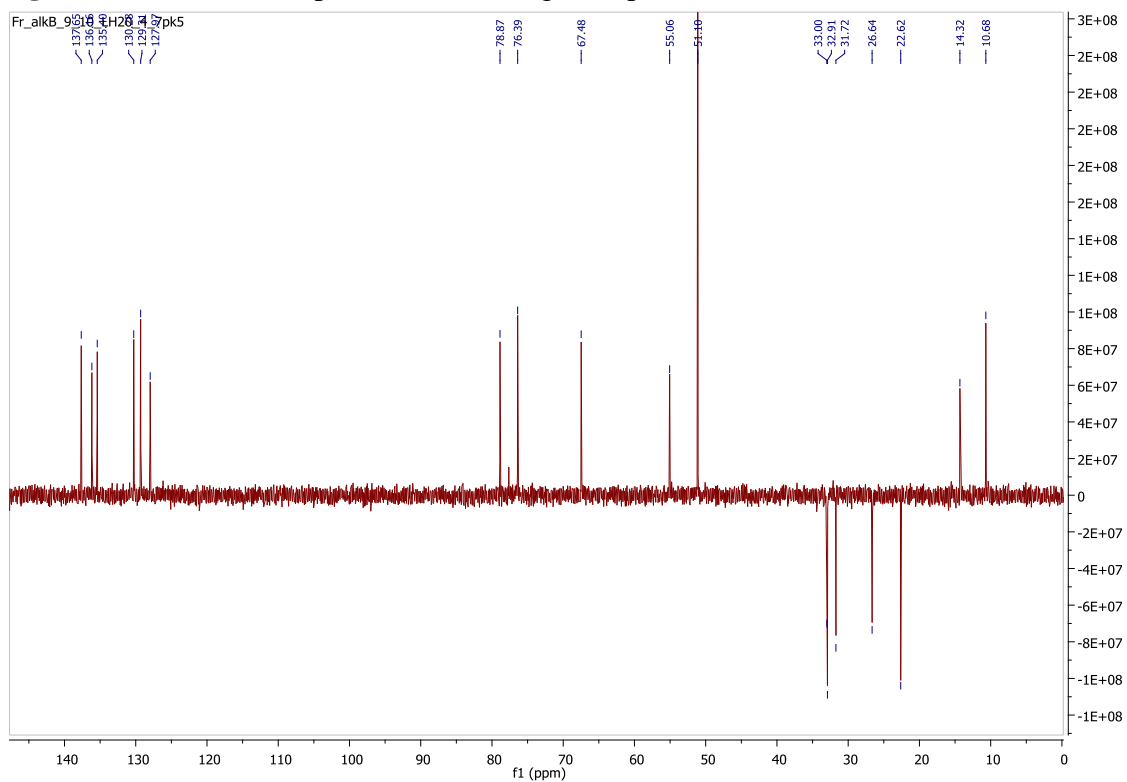

**Figure S11.** HSQC spectrum of Microgrewiapiine B (**2**). ( $\text{CDCl}_3$ , 400 MHz)

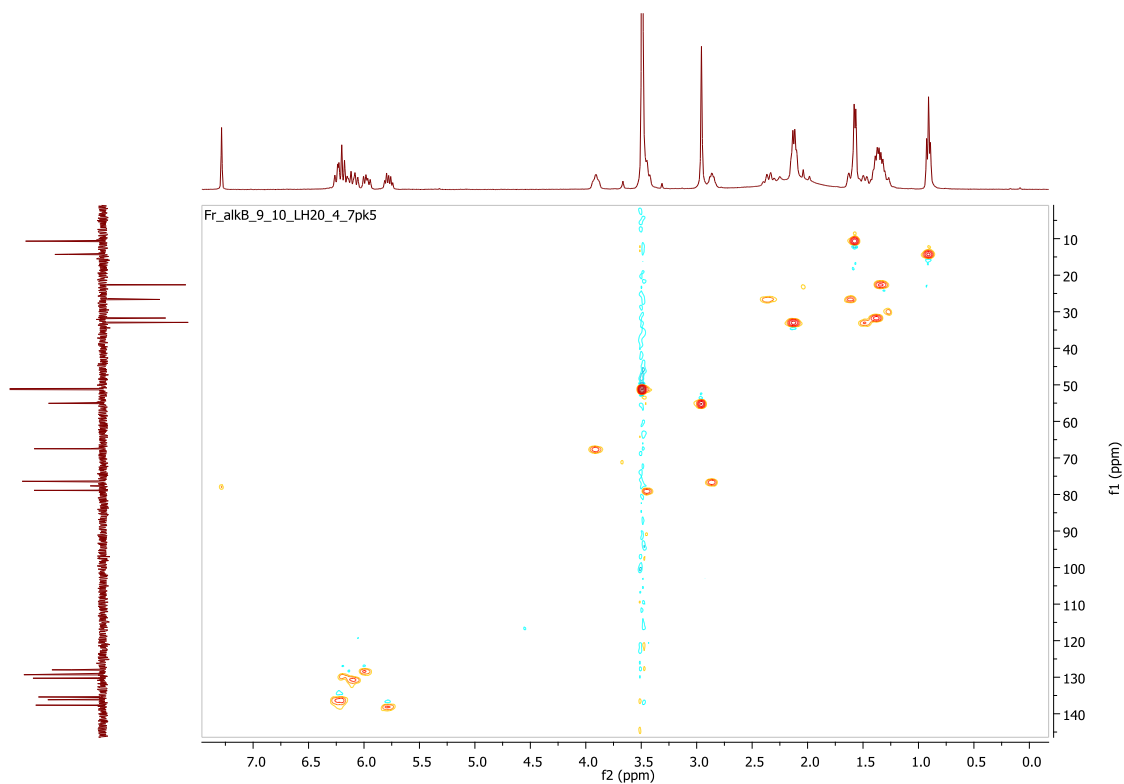

**Figure S12.** HMBC spectrum of Microgrewiapine B (**2**). (CDCl<sub>3</sub>, 400 MHz)

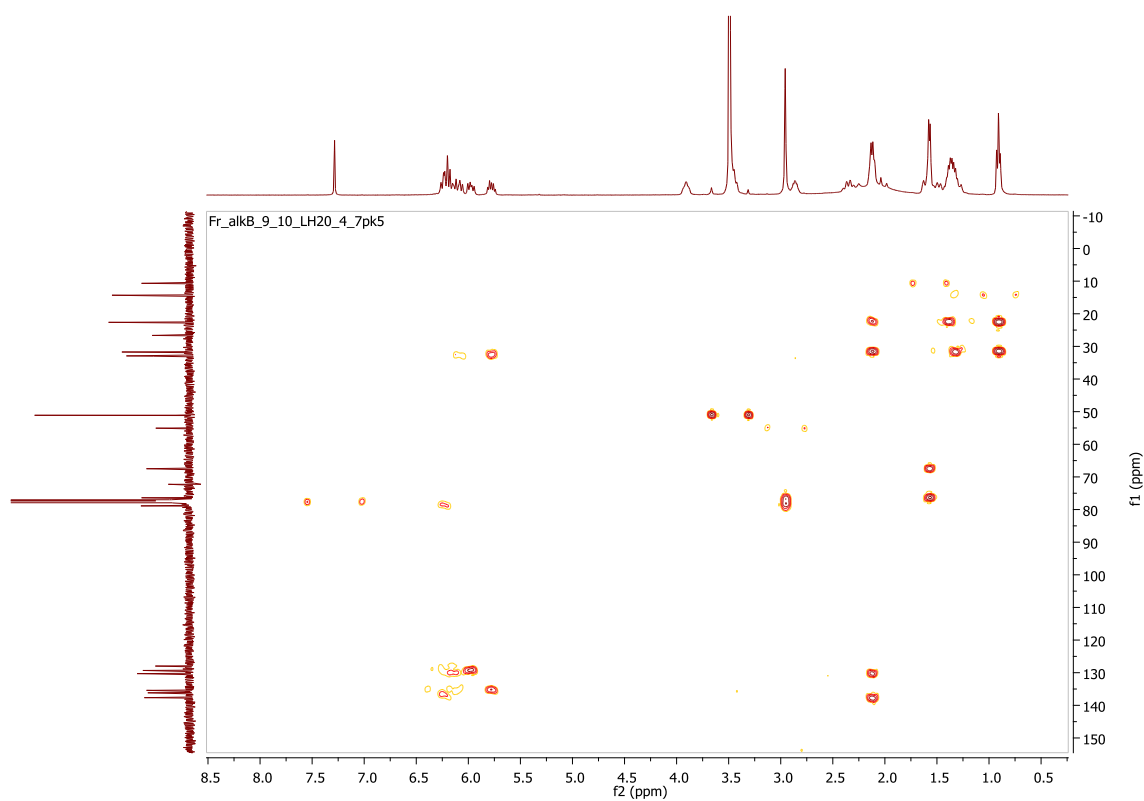

**Figure S13.** COSY spectrum of Microgrewiapine B (**2**). (CDCl<sub>3</sub>, 400 MHz)

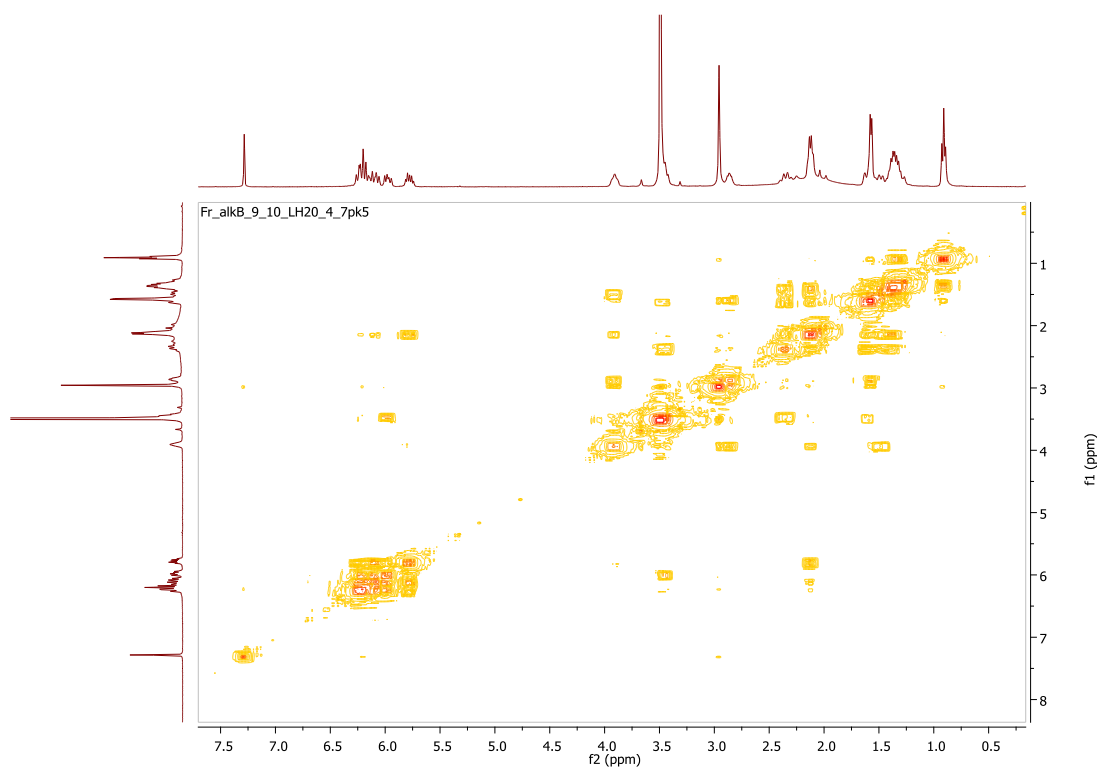

**Figure S14.** NOESY spectrum of Microgrewiapine B (**2**). (CDCl<sub>3</sub>, 400 MHz)

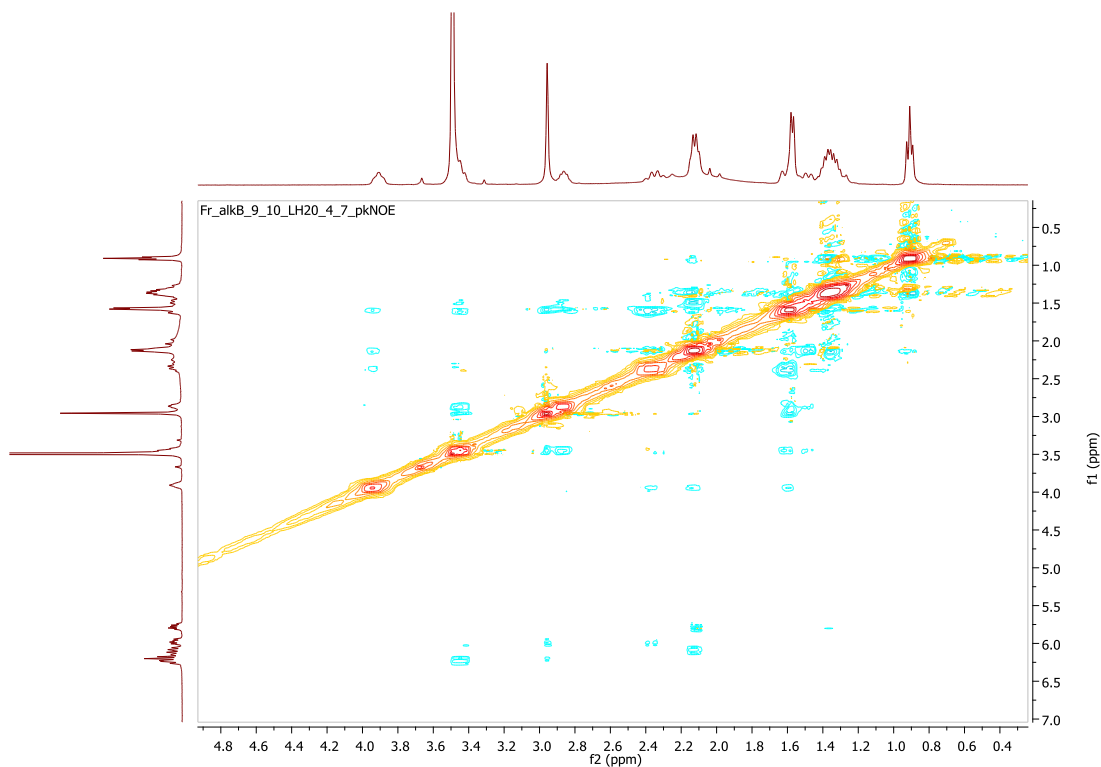

**Figure S15.** <sup>1</sup>H NMR spectrum of Microgrewiapine C (**3**) (CDCl<sub>3</sub>, 400 MHz)

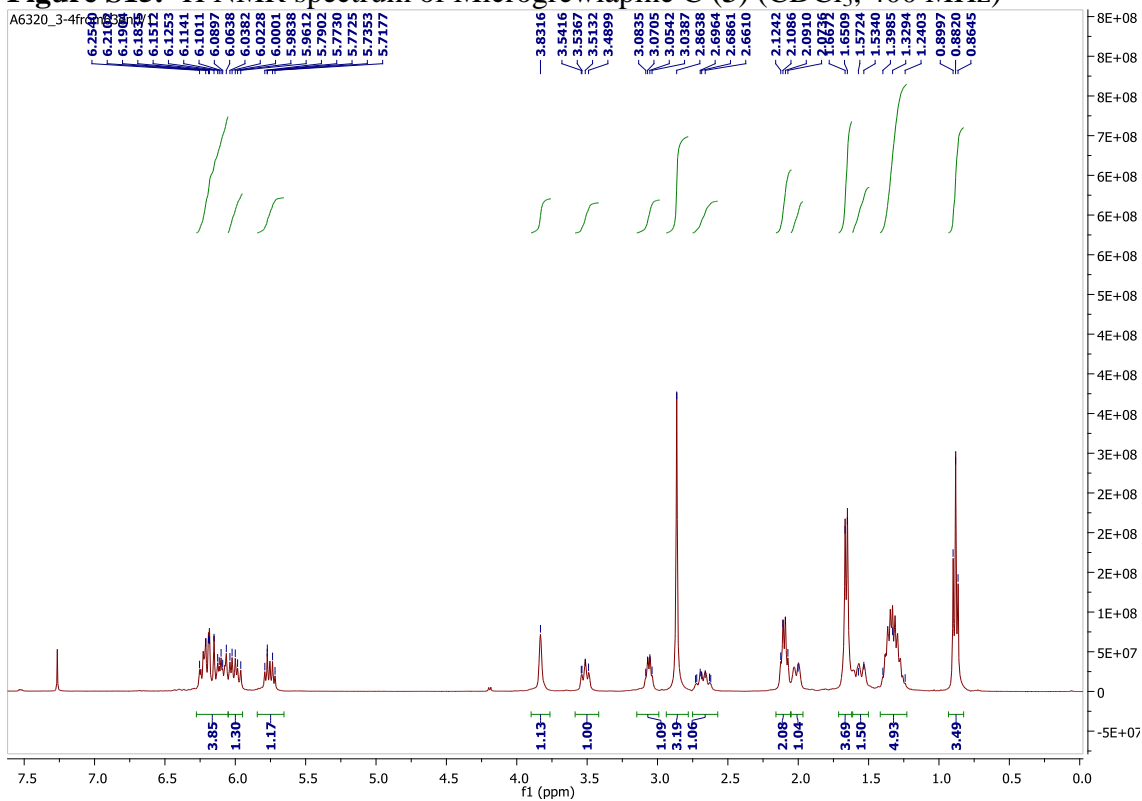

**Figure S16.**  $^{13}\text{C}$  NMR spectrum of Microgrewiapine C (**3**). ( $\text{CDCl}_3$ , 100 MHz)

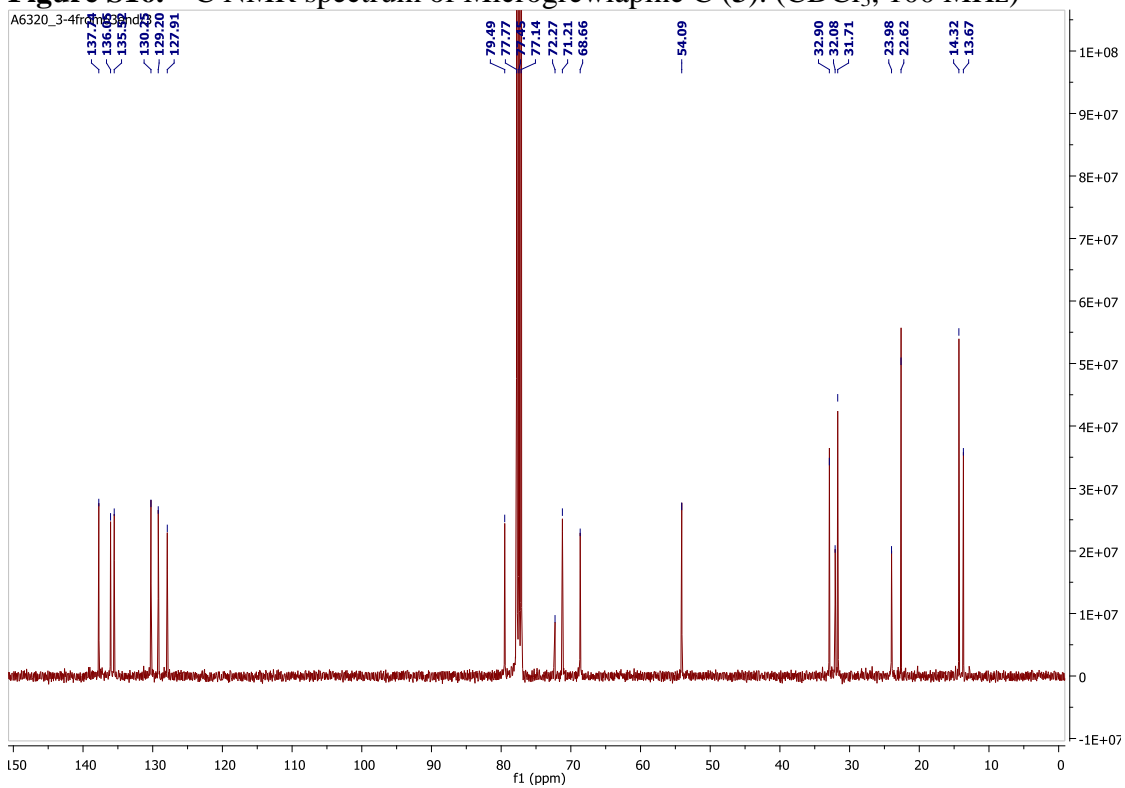

**Figure S17.**  $^{13}\text{C}$  DEPT spectrum of Microgrewiapine C (**3**). ( $\text{CDCl}_3$ , 100 MHz)

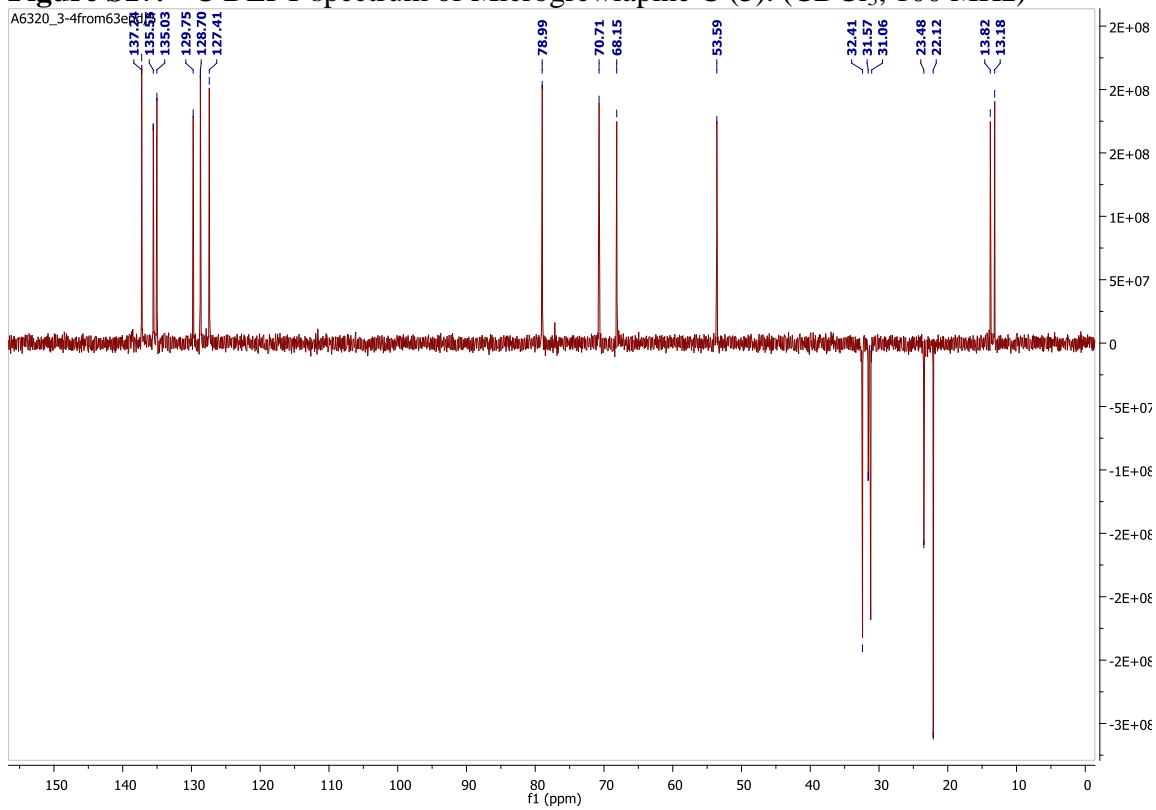

**Figure S18.** HSQC spectrum of Microgrewiapine C (**3**). (CDCl<sub>3</sub>, 400 MHz)

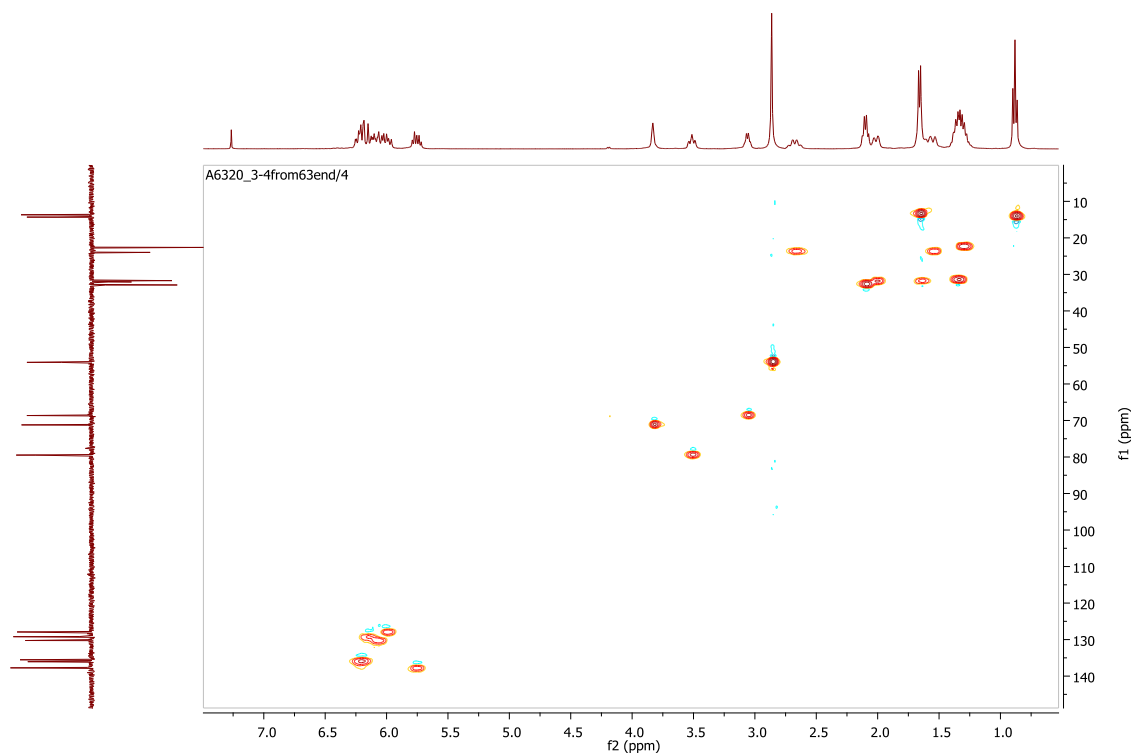

**Figure S19.** HMBC spectrum of Microgrewiapine C (**3**). (CDCl<sub>3</sub>, 600 MHz)

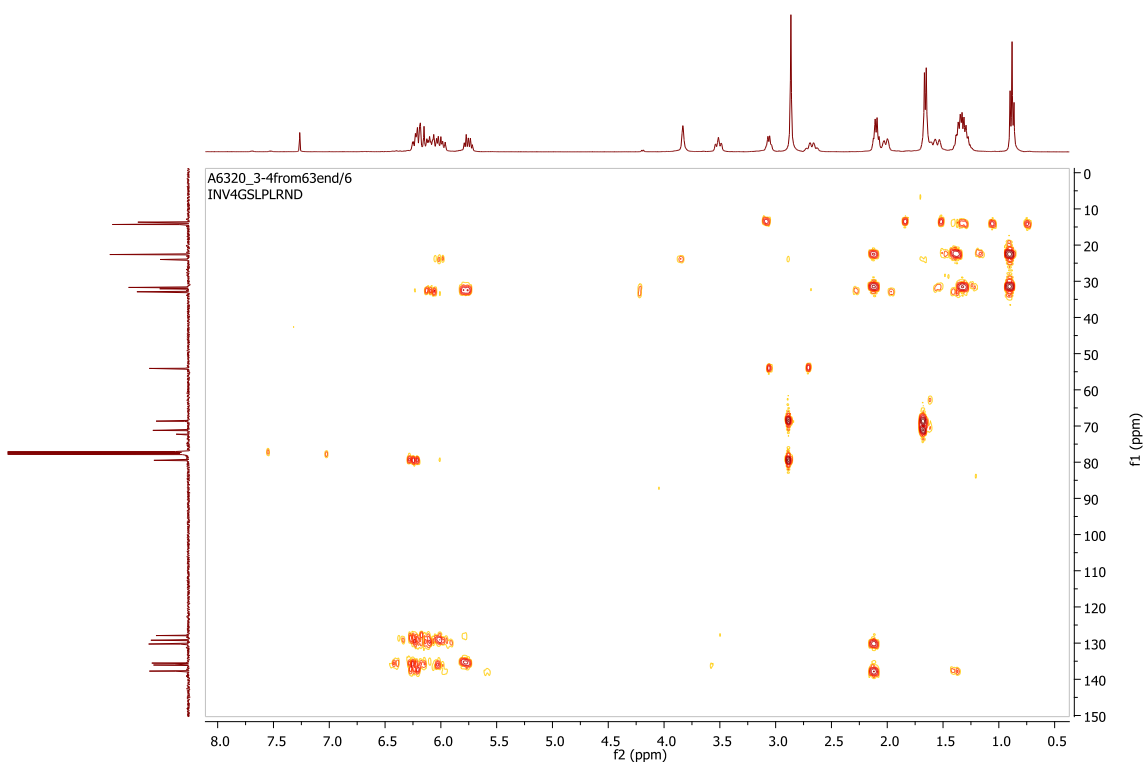

**Figure S20.** COSY spectrum of Microgrewiapiine C (**3**). (CDCl<sub>3</sub>, 400 MHz)

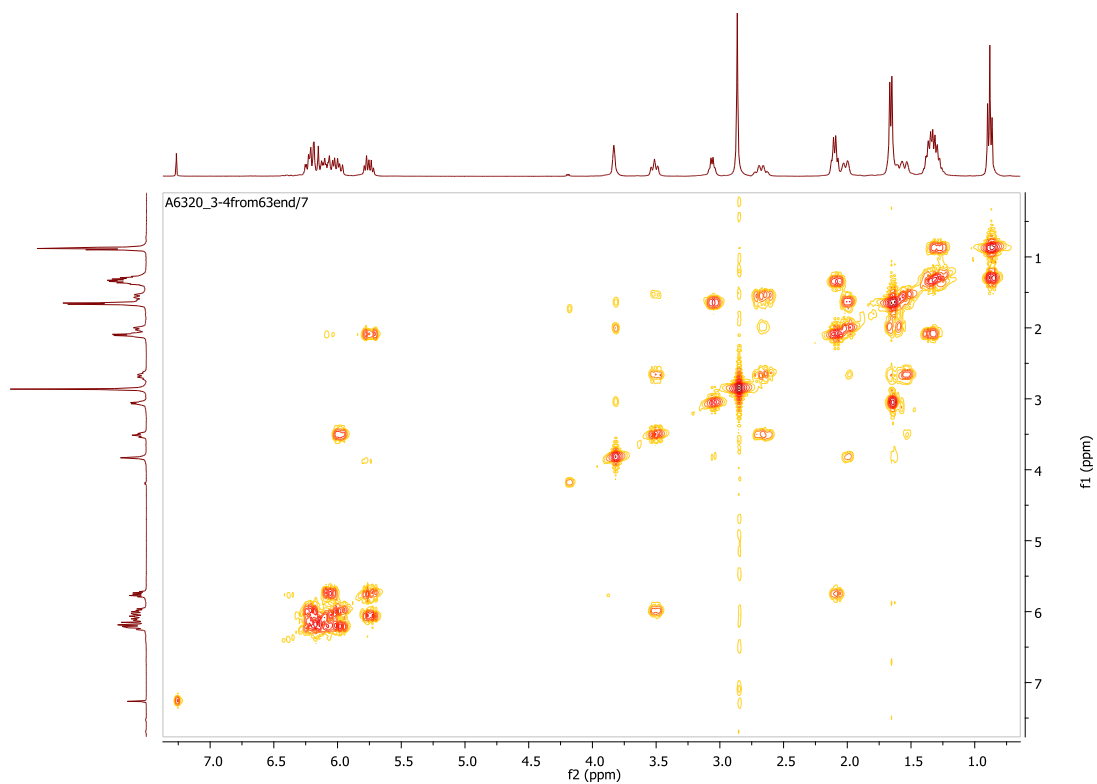

**Figure S21.** NOESY spectrum of Microgrewiapiine C (**3**). (CDCl<sub>3</sub>, 400 MHz)

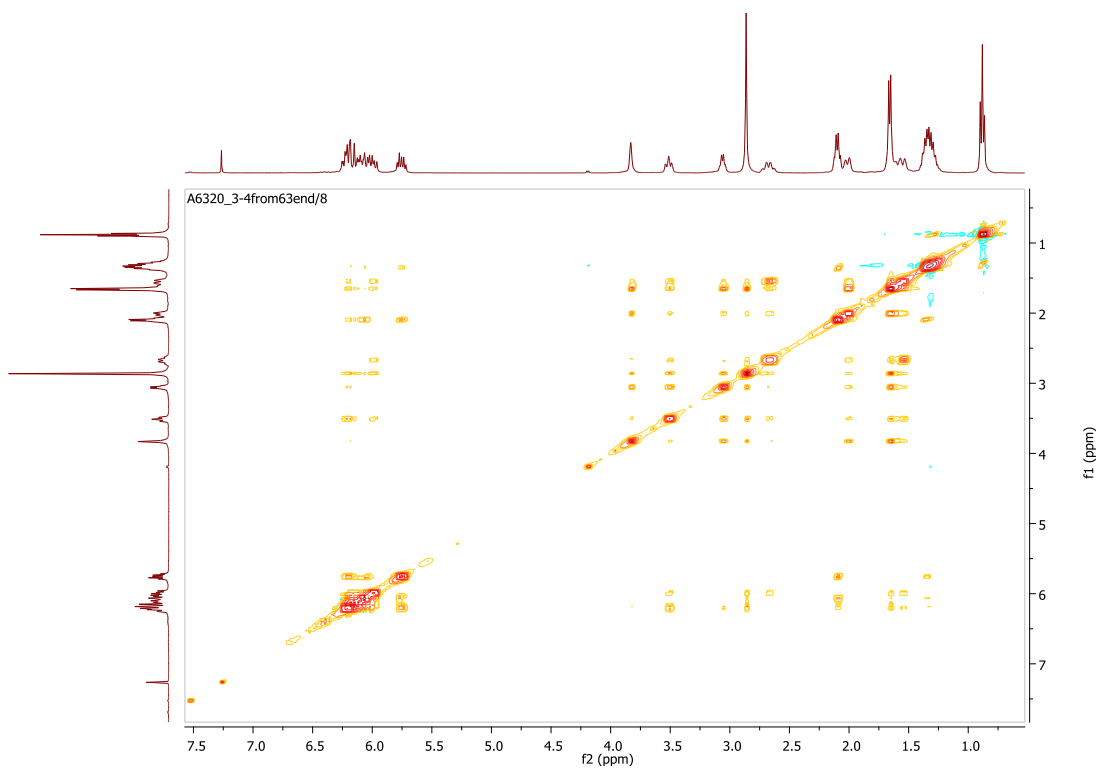

**Figure S22.** ESIMS spectrum of Microgrewiapine A (1).

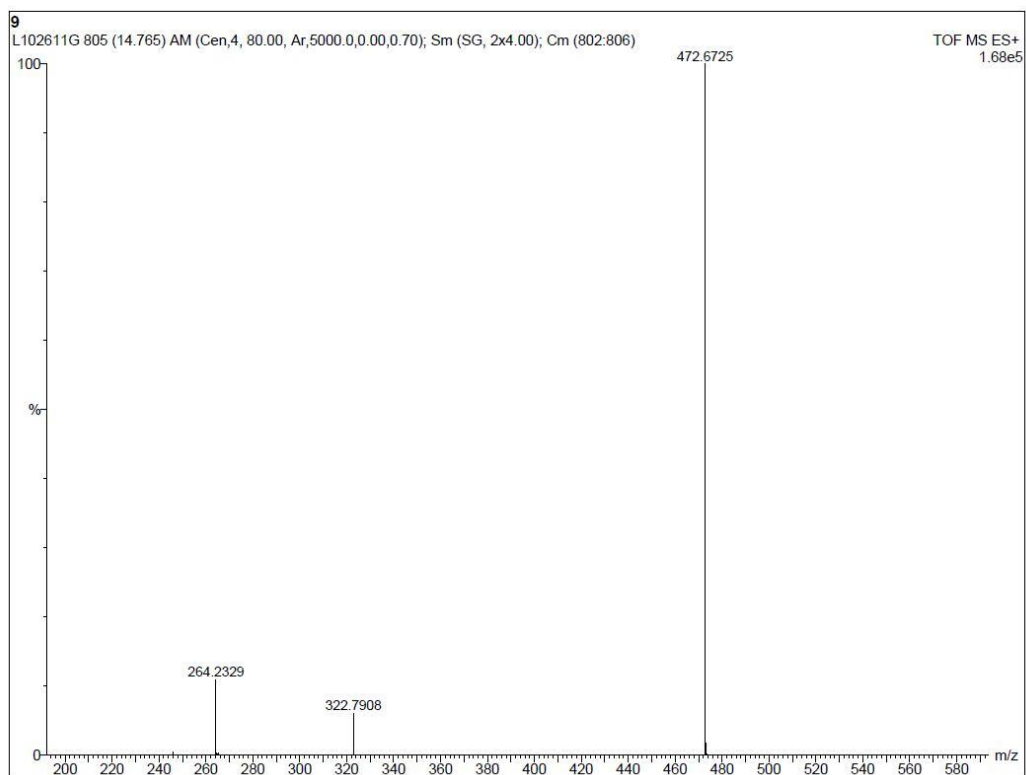

**Figure S23.** ESIMS spectrum of Microgrewiapine B (2).

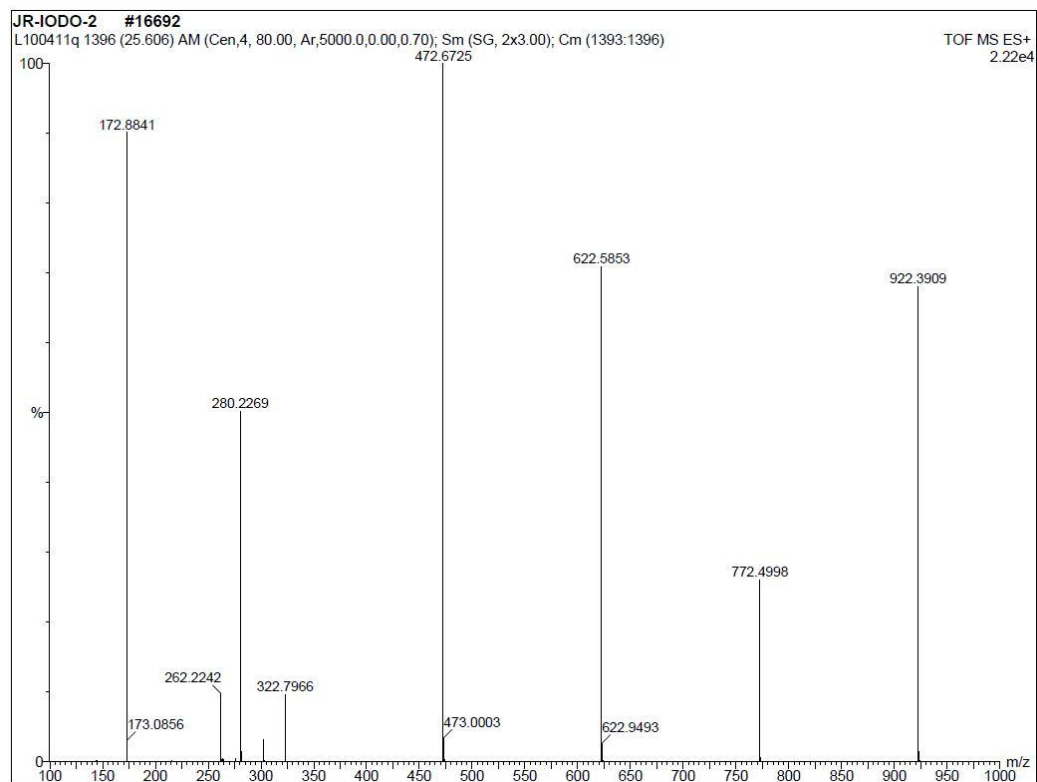

**Figure S24.** ESIMS spectrum of Microgrewiapiine C (**3**).

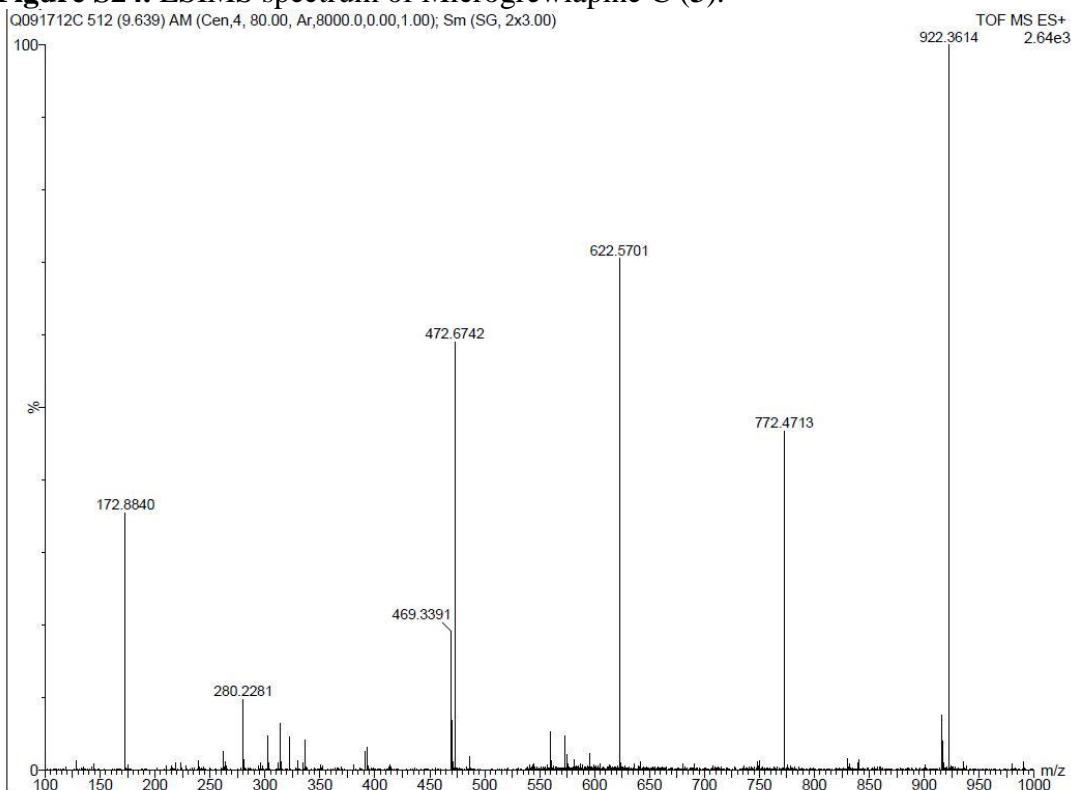

**Figure S25.**  $^1\text{H}$  NMR spectrum of (*R*)- and (*S*)-MTPA esters of **1** (pyridine- $d_5$ , 400 MHz) – overlay of (*R*) (top spectrum) and (*S*) (bottom spectrum)

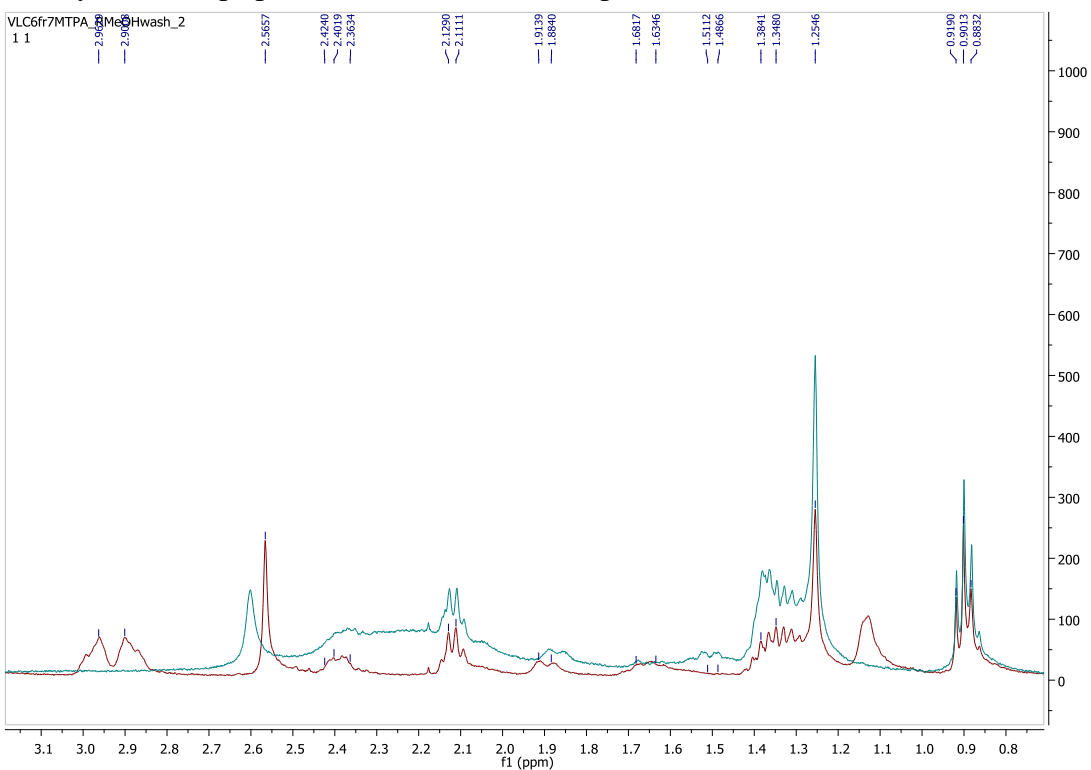



**Figure S26.** COSY spectrum of (*R*)-MTPA ester of **1** (pyridine-*d*<sub>5</sub>, 400 MHz)

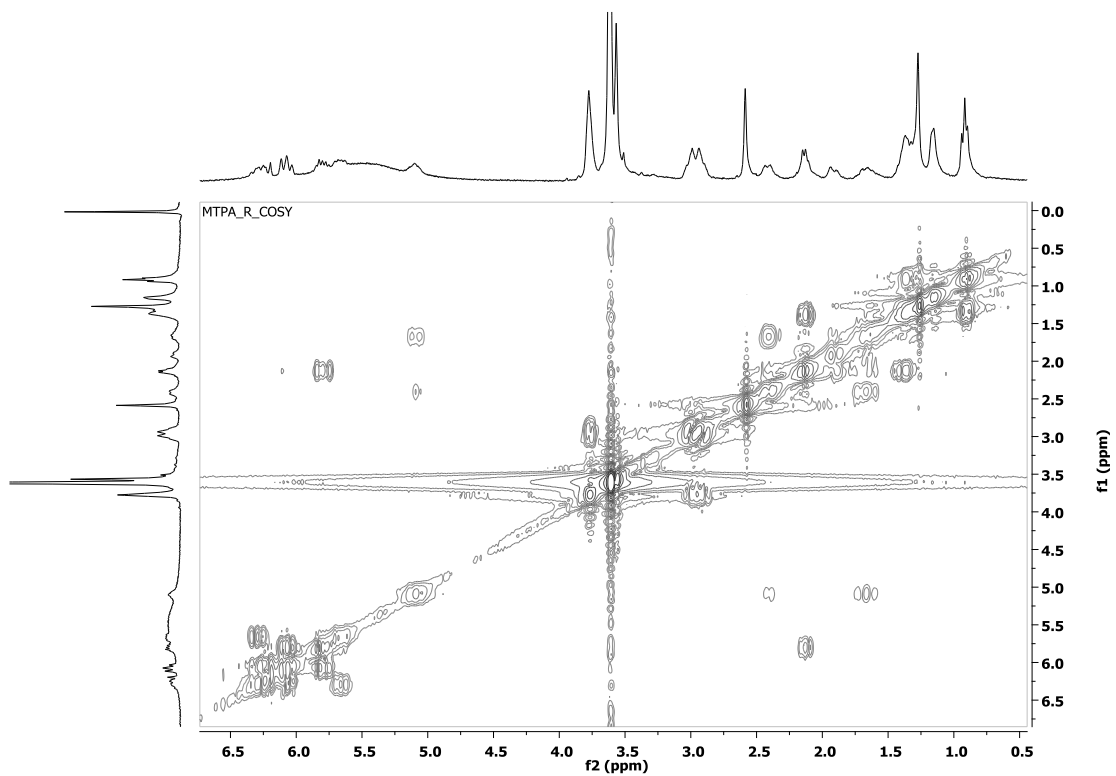

Supplement: NIHMS437299-supplement-1_si_001.pdf [file NIHMS437299-supplement-1_si_001.pdf]
